# Supplementary material for: Nonenveloped Avian Reoviruses Released with Small Extracellular Vesicles Are Highly Infectious
Source: MDPI journal article supplement (doi:10.3390/v15071610), 2023-07-23
Supplement: s1 [file s1]

**Supplementary Figure S1.** The  $\sigma$ C protein is present in EVs. The western blots were developed same as in Figure 3B, but analyzed by using chicken polyclonal antiserum against ARV. A very strong band was observed (as indicated by arrow in the left image in the EVs fractions, which was identified as  $\sigma$ C by mass spectrometry. The band was excised from the right SDS-PAGE gel to analyze by mass spec. The dashed line is used to indicate the position of the band to compare the western blots with the gel stained by Gelcode™ Blue Stain Reagent.

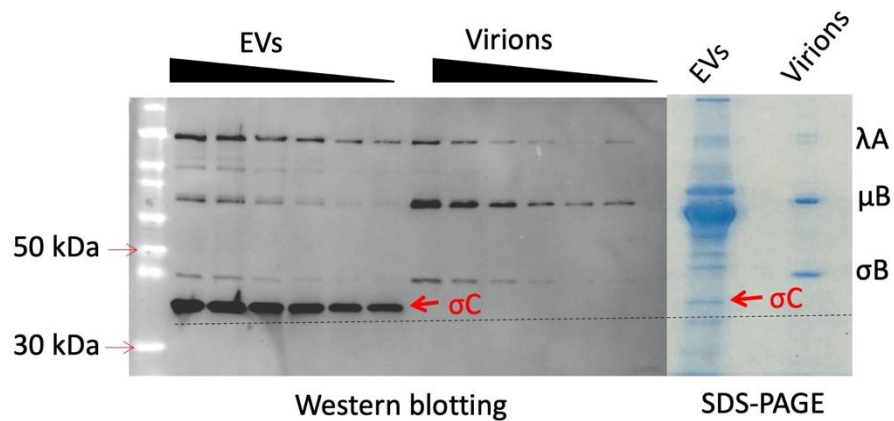

**Supplementary Figure S2.** Triton and sonication could not remove  $\sigma$ C protein from the virions. The Western blots were the full image shown in the Figure 1C (top), which was probed with the chicken antibody against ARV virion.

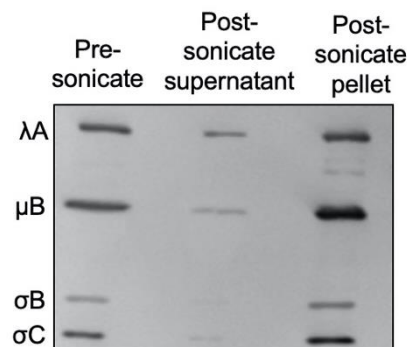

**Supplementary Table S1.** Mass spectrometry identifies the larger protein band as  $\sigma$ C protein.

| Unique Peptides | Peptides | Group Description | Molecular Weight (kDa) |
|-----------------|----------|-------------------|------------------------|
| 3               | 14       | $\sigma$ C        | 35.0                   |
| 3               | 9        | $\sigma$ C        |                        |
| 3               | 7        | $\sigma$ C        |                        |
| 2               | 16       | $\sigma$ C        |                        |
| 2               | 12       | $\sigma$ C        |                        |
| 2               | 11       | $\sigma$ C        |                        |
| 1               | 10       | $\sigma$ C        |                        |
| 1               | 2        | $\sigma$ C        |                        |
| 1               | 1        | $\sigma$ C        |                        |
| 1               | 1        | $\sigma$ C        |                        |
| 1               | 1        | $\sigma$ C        |                        |
| 1               | 1        | $\sigma$ C        |                        |
| Total 20        | Total 84 |                   |                        |

**Supplementary Video S1.** The cryoEM tomogram of EVs.

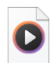

exosome tomography movie.m4v
